# Supplementary material
Source: publisher site journal article supplement (https://www.degruyterbrill.com/publication/isbn/9783805912068/downloadAsset/9783805912068_Inhaltsverzeichnis.pdf)
Supplement: Supplementary file 1 [file 9783805912068_Inhaltsverzeichnis.pdf]

# Inhaltsübersicht

|                                                         | Seite * |
|---------------------------------------------------------|---------|
| Allgemeines Schrifttum .....                            | IX      |
| Gesetz über das Erbbaurecht .....                       | 1       |
| Abschnitt 4 · Dienstbarkeiten                           |         |
| Titel 1 · Grunddienstbarkeiten .....                    | 277     |
| Titel 2 · Nießbrauch .....                              | 493     |
| Untertitel 1 · Nießbrauch an Sachen .....               | 562     |
| Untertitel 2 · Nießbrauch an Rechten .....              | 726     |
| Untertitel 3 · Nießbrauch an einem Vermögen .....       | 822     |
| Titel 3 · Beschränkte persönliche Dienstbarkeiten ..... | 853     |
| Abschnitt 5 · Vorkaufsrecht .....                       | 943     |
| Abschnitt 6 · Reallasten .....                          | 1003    |
| Sachregister .....                                      | 1075    |

---

\* Zitiert wird nicht nach Seiten, sondern nach Paragraph bzw Artikel und Randnummer; siehe dazu auch „Zitierweise“.
